# Supplementary material for: Emerging chalcogenide based van der Waals heterostructures for ultrathin excitonic solar cells with enhanced photo-conversion efficiency
Source: Royal Society of Chemistry journal article supplement (doi:10.1039/d4ta08172b), 2025-01-01
Supplement: d4ta08172b1.pdf [file d4ta08172b1.pdf]

# Emerging Chalcogenide based van der Waals Heterostructures for Ultrathin Excitonic Solar Cells with enhanced Photo-conversion Efficiency

Ponnappa Kechanda Prasanna and Sudip Chakraborty\*

*Materials Theory for Energy Scavenging (MATES Lab), Harish-Chandra Research Institute,  
A CI of Homi Bhabha National Institute, Chhatnag Road, Jhansi, Prayagraj - 211019*

E-mail: sudipchakraborty@hri.res.in, sudiphys@gmail.com

## Different possible heterostructure stacking order

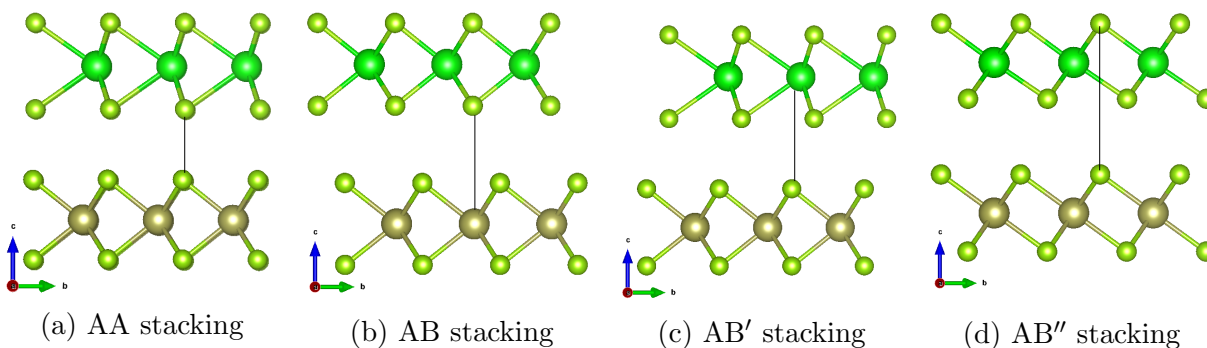

Figure 1: Different stacking arrangements considered for structural optimization of hetero-bilayer.

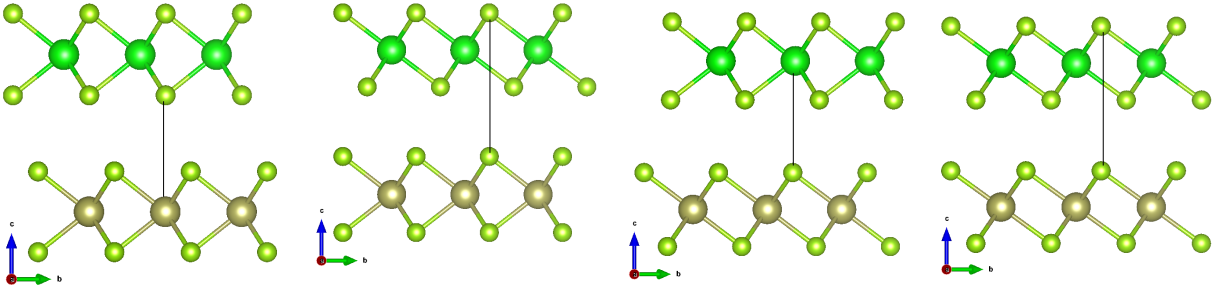

(a)  $\text{ZrSe}_2:2\text{H}/\text{HfSe}_2:2\text{H}$  (b)  $\text{ZrSe}_2:1\text{T}/\text{HfSe}_2:2\text{H}$  (c)  $\text{ZrSe}_2:2\text{H}/\text{HfSe}_2:1\text{T}$  (d)  $\text{ZrSe}_2:1\text{T}/\text{HfSe}_2:1\text{T}$

Figure 2: Optimized geometry of hetero-bilayers with combination of different monolayers .

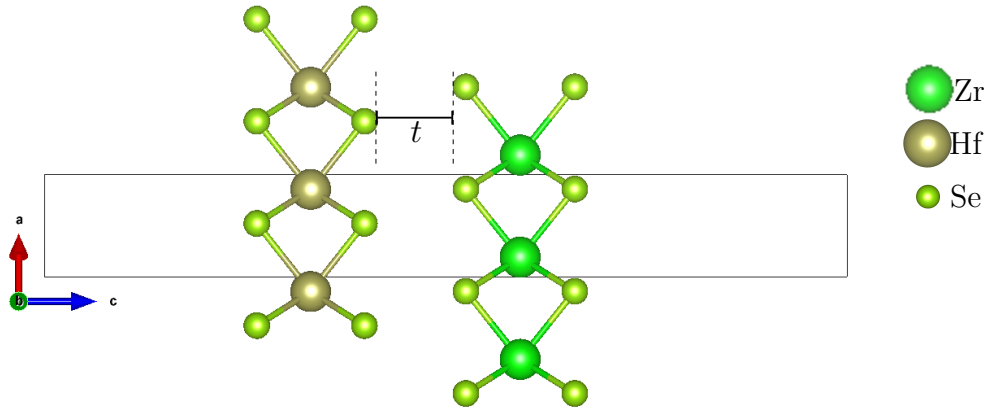

Figure 3: Schematic representation along the  $ac$  direction of hetero-bilayer ( $3 \times 3$  supercell),  $t$  is the distance between the layers.

# Mechanical Stability

## Monolayers

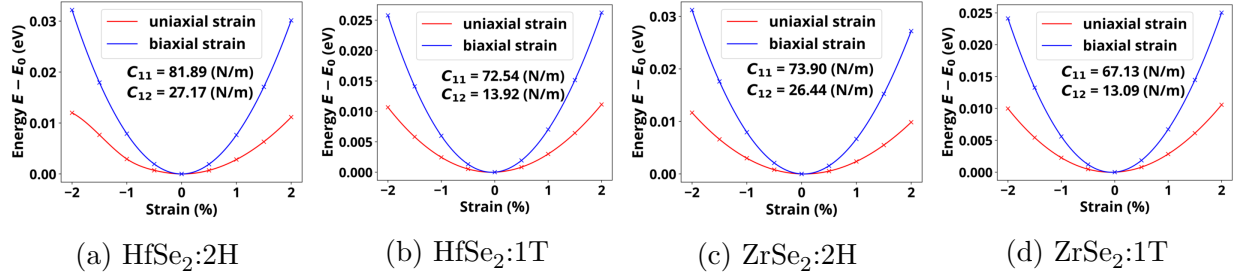

Figure 4: Total energy variation for monolayers with applied external strain.  $C_{11}$  and  $C_{12}$  are the elastic constants. The blue line shows the variation of total energy with biaxial strain, while the red line shows that of the uni-axial strain.

## Heterostructure

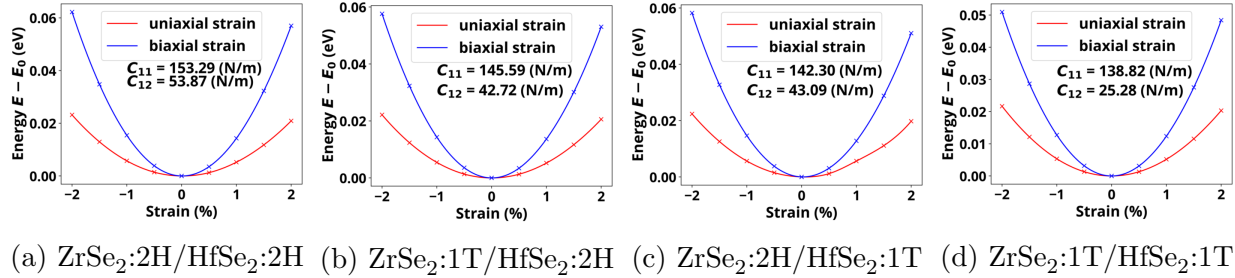

Figure 5: Total energy variation for hetero-bilayer with applied external strain.  $C_{11}$  and  $C_{12}$  are the elastic constants. The blue line shows the variation of total energy with biaxial strain, while the red line shows that of the uni-axial strain.

# Electronic Properties

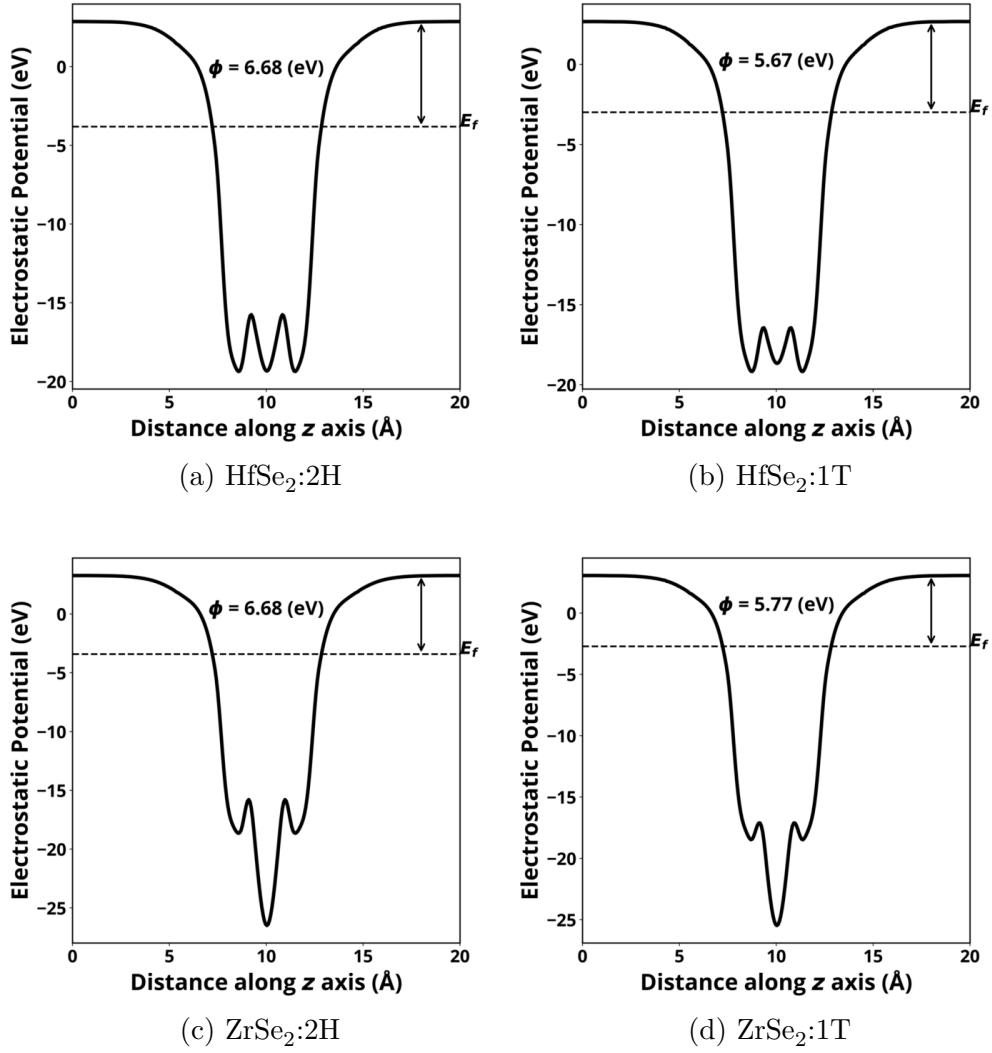

Figure 6: Electrostatic potential average along the  $z$  axis and the work function.

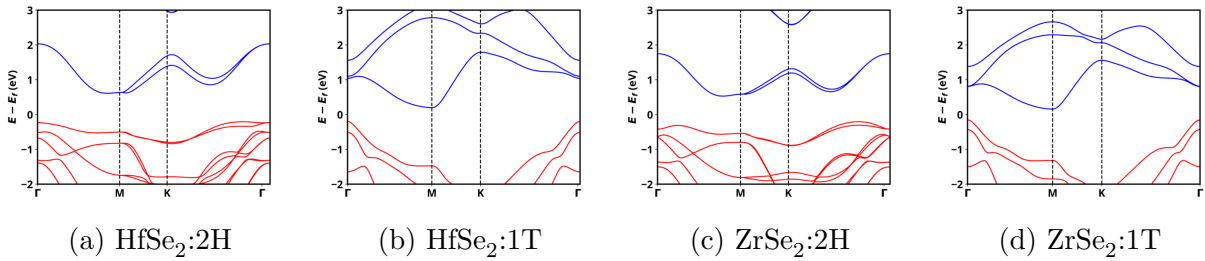

Figure 7: Band structure of monolayers calculated using PBE.

Table 1: Deformation Potential  $E_{ex}$  and  $E_{hx}$  electrons and holes; Effective mass  $m_{e1}$  and  $m_{e2}$  of electrons,  $m_{h1}$  and  $m_{h2}$  of holes along two directions; and mobility  $\mu_e$ ,  $\mu_h$  of electrons and holes, respectively in heterostructure.

| Heterostructure                             | $E_{ex}$<br>(eV) | $E_{hx}$<br>(eV) | $m_{e1}^*$<br>( $m_0$ ) | $m_{e2}^*$<br>( $m_0$ ) | $m_{h1}^*$<br>( $m_0$ ) | $m_{h2}^*$<br>( $m_0$ ) | $\mu_e$<br>( $\text{cm}^2\text{V}^{-1}\text{s}^{-1}$ ) | $\mu_h$<br>( $\text{cm}^2\text{V}^{-1}\text{s}^{-1}$ ) |
|---------------------------------------------|------------------|------------------|-------------------------|-------------------------|-------------------------|-------------------------|--------------------------------------------------------|--------------------------------------------------------|
| ZrSe <sub>2</sub> :2H/HfSe <sub>2</sub> :2H | -3.60            | -3.26            | 1.07                    | 2.43                    | -1.11                   | -2.23                   | 146.00                                                 | 175.90                                                 |
| ZrSe <sub>2</sub> :1T/HfSe <sub>2</sub> :2H | -7.16            | -6.50            | 0.83                    | 1.60                    | -0.16                   | -0.17                   | 63.23                                                  | 2781.22                                                |
| ZrSe <sub>2</sub> :1T/HfSe <sub>2</sub> :1T | -2.89            | -8.73            | 0.25                    | 1.84                    | -0.16                   | -0.17                   | 1859.70                                                | 1469.80                                                |

ZrSe<sub>2</sub>:2H/HfSe<sub>2</sub>:1T has a very low band gap and shows a metallic behaviour for PBE calculation therefore finding deformation potential for the same is not feasible.

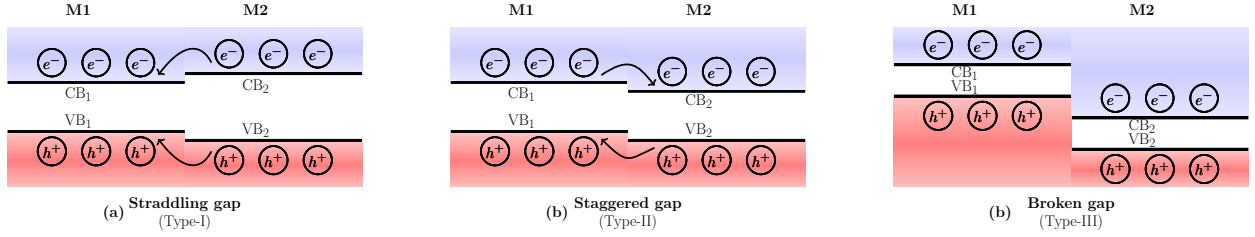

Figure 8: Three different possibilities of band alignment in semiconductor heterojunctions
